# Supplementary material for: miR-183 Inhibits UV-Induced DNA Damage Repair in Human Trabecular Meshwork Cells by Targeting of KIAA0101
Source: PubMed Central journal article supplement — Invest Ophthalmol Vis Sci. 2016 Apr 26;57(4):2178–86. doi: 10.1167/iovs.15-18665 (PMC4849888; doi:10.1167/iovs.15-18665), 2016-04-26
Supplement: i1552-5783-57-4-2178-s01.pdf [file i1552-5783-57-4-2178-s01.pdf]

1 **Supplementary Material**

2

3 **Supplementary Table S1.** Affymetrix gene array data showed that genes were  
 4 differentially expressed more than 2-fold ( $p < 0.05$ ) by miR-183 in HTM cells

| Probe Set ID | Fold change<br>([183] vs [con]) | p-value     | Unigene (Avadis) | Gene Symbol | Microcosm | TargetScan | PicTar-Vert |
|--------------|---------------------------------|-------------|------------------|-------------|-----------|------------|-------------|
| 209459_s_at  | -3.781179                       | 3.77E-03    | Hs.336768        | ABAT        |           |            |             |
| 209460_at    | -2.770565                       | 5.78E-03    | Hs.336768        | ABAT        |           |            |             |
| 200974_at    | -2.013809                       | 1.27E-02    | Hs.500483        | ACTA2       |           |            |             |
| 202274_at    | -3.13484                        | 1.76E-04    | Hs.516105        | ACTG2       |           |            |             |
| 205083_at    | 2.048626                        | 3.11E-02    | Hs.406238        | AOX1        |           |            |             |
| 206632_s_at  | -3.073335                       | 0.0085069   | Hs.226307        | APOBEC3B    |           |            |             |
| 219918_s_at  | -3.366546                       | 0.0014902   | Hs.121028        | ASPM        |           |            |             |
| 204092_s_at  | -2.7691                         | 0.0059318   | Hs.250822        | AURKA       |           |            |             |
| 208079_s_at  | -2.458599                       | 2.13E-02    | Hs.250822        | AURKA       |           |            |             |
| 209464_at    | -2.395002                       | 1.91E-02    | Hs.442658        | AURKB       |           |            |             |
| 202094_at    | -2.662949                       | 0.025427552 | Hs.514527        | BIRC5       |           |            |             |
| 202095_s_at  | -3.533895                       | 0.002646    | Hs.514527        | BIRC5       |           |            |             |
| 210334_x_at  | -2.090363                       | 1.42E-03    | Hs.514527        | BIRC5       |           |            |             |
| 209642_at    | -3.200778                       | 0.002552    | Hs.469649        | BUB1        |           |            |             |
| 215509_s_at  | -2.282037                       | 0.0014631   | Hs.469649        | BUB1        |           |            |             |
| 203755_at    | -3.458603                       | 5.40E-04    | Hs.631699        | BUB1B       |           |            |             |
| 219806_s_at  | -2.134782                       | 0.009711    | Hs.438064        | C11orf75    |           | T          |             |
| 217640_x_at  | -2.002571                       | 0.032181    | Hs.134726        | C18orf24    |           |            |             |
| 203418_at    | -2.654844                       | 0.001810    | Hs.58974         | CCNA2       |           |            |             |
| 213226_at    | -2.451741                       | 0.0124573   | Hs.58974         | CCNA2       |           |            |             |
| 214710_s_at  | -2.920187                       | 1.00E-04    | Hs.23960         | CCNB1       | T         |            |             |
| 202705_at    | -2.868263                       | 2.68E-04    | Hs.194698        | CCNB2       |           |            |             |
| 203213_at    | -3.454882                       | 0.0049068   | Hs.334562        | CDC2        |           |            |             |
| 203214_x_at  | -2.877687                       | 0.0037367   | Hs.334562        | CDC2        |           |            |             |
| 210559_s_at  | -3.126771                       | 1.87E-03    | Hs.334562        | CDC2        |           |            |             |
| 202870_s_at  | -3.651807                       | 0.0044540   | Hs.524947        | CDC20       |           |            |             |
| 204126_s_at  | -2.098042                       | 6.67E-03    | Hs.474217        | CDC45L      |           |            |             |
| 203967_at    | -2.686684                       | 0.018128    | Hs.405958        | CDC6        |           |            |             |
| 221436_s_at  | -2.08565                        | 0.003739    | Hs.524216        | CDCA3       |           |            |             |
| 221520_s_at  | -2.048844                       | 0.033373    | Hs.709512        | CDCA8       |           |            |             |
| 206280_at    | 2.727546                        | 0.0016561   | Hs.317632        | CDH18       |           |            |             |
| 209714_s_at  | -2.039934                       | 0.0115109   | Hs.84113         | CDKN3       | T         |            |             |
| 204962_s_at  | -2.668801                       | 7.60E-03    | Hs.1594          | CENPA       |           |            |             |
| 205046_at    | -2.588846                       | 0.0021577   | Hs.75573         | CENPE       |           |            |             |

|             |           |            |           |                                                            |   |   |   |
|-------------|-----------|------------|-----------|------------------------------------------------------------|---|---|---|
| 207828_s_at | -2.763046 | 1.83E-04   | Hs.497741 | CENPF                                                      |   |   |   |
| 209172_s_at | -2.251038 | 5.38E-04   | Hs.497741 | CENPF                                                      |   |   |   |
| 214804_at   | -2.128053 | 0.0399844  | Hs.318398 | CENPI                                                      |   |   |   |
| 218542_at   | -4.035945 | 9.64E-04   | Hs.14559  | CEP55                                                      |   |   |   |
| 209395_at   | 2.442728  | 2.58E-02   | Hs.382202 | CHI3L1                                                     |   |   |   |
| 209396_s_at | 2.479816  | 0.0204517  | Hs.382202 | CHI3L1                                                     |   |   |   |
| 206165_s_at | 2.111558  | 0.0170939  | Hs.241551 | CLCA2                                                      |   |   |   |
| 208096_s_at | 2.291132  | 1.79E-02   | Hs.47629  | COL21A1                                                    |   |   |   |
| 217844_at   | -3.56614  | 1.74E-03   | Hs.709352 | CTDSP1                                                     |   | T | T |
| 207850_at   | -2.497697 | 9.05E-04   | Hs.89690  | CXCL3                                                      | T |   |   |
| 220295_x_at | -3.988362 | 0.00736872 | Hs.445098 | DEPDC1                                                     |   |   |   |
| 203764_at   | -3.539283 | 0.0039895  | Hs.77695  | DLG7                                                       |   |   |   |
| 218585_s_at | -3.008428 | 6.37E-03   | Hs.656473 | DTL                                                        |   |   |   |
| 221563_at   | -2.087521 | 1.66E-03   | Hs.497822 | DUSP10                                                     | T | T | T |
| 201324_at   | -2.46042  | 0.0165686  | Hs.436298 | EMP1                                                       |   |   |   |
| 201325_s_at | -2.344159 | 0.01580251 | Hs.436298 | EMP1                                                       |   |   |   |
| 217820_s_at | -2.050615 | 0.0040929  | Hs.497893 | ENAH                                                       |   | T | T |
| 203619_s_at | 2.032953  | 1.60E-02   | Hs.567424 | FAIM2                                                      |   |   |   |
| 221591_s_at | -2.541675 | 1.70E-04   | Hs.592116 | FAM64A                                                     |   |   |   |
| 213007_at   | -2.186525 | 0.0112575  | Hs.513126 | FANCI                                                      |   |   |   |
| 204135_at   | 2.284528  | 4.21E-04   | Hs.104672 | FILIP1L                                                    |   |   |   |
| 40665_at    | 2.16411   | 0.0243379  | Hs.445350 | FMO3                                                       |   |   |   |
| 202580_x_at | -2.148938 | 1.48E-02   | Hs.239    | FOXM1                                                      |   |   |   |
| 221521_s_at | -2.142594 | 0.0145854  | Hs.433180 | GIN5                                                       |   |   |   |
| 207157_s_at | -5.367361 | 9.12E-05   | Hs.645427 | GNG5                                                       | T | T | T |
| 204318_s_at | -2.337598 | 0.0179649  | Hs.386189 | GTSE1                                                      |   |   |   |
| 211555_s_at | 2.030661  | 8.00E-03   | Hs.77890  | GUCY1B3                                                    |   |   |   |
| 203821_at   | -2.415553 | 0.004702   | Hs.799    | HBEGF                                                      | T |   |   |
| 38037_at    | -2.21448  | 4.08E-03   | Hs.799    | HBEGF                                                      | T |   |   |
| 202708_s_at | 2.015879  | 0.0095692  | Hs.2178   | HIST2H2BE                                                  |   |   |   |
| 218726_at   | -2.141276 | 8.07E-03   | Hs.532968 | HJURP                                                      |   |   |   |
| 206247_at   | -2.573702 | 5.99E-03   | Hs.549053 | HLA-B /// HLA-C<br>/// MICA /// MICB /// XXbac-BPG181B23.1 |   |   |   |
| 208808_s_at | -2.029881 | 1.73E-03   | Hs.434953 | HMGB2                                                      |   |   |   |
| 207165_at   | -3.773434 | 0.0081598  | Hs.72550  | HMMR                                                       |   |   |   |
| 209709_s_at | -2.775011 | 0.010087   | Hs.72550  | HMMR                                                       |   |   |   |
| 206638_at   | 2.595501  | 1.55E-02   | Hs.421649 | HTR2B                                                      |   |   |   |
| 210046_s_at | -2.37163  | 4.56E-02   | Hs.596461 | IDH2                                                       | T | T | T |
| 206924_at   | -3.593291 | 0.0386597  | Hs.467304 | IL11                                                       |   |   |   |
| 205207_at   | -2.374293 | 1.09E-04   | Hs.654458 | IL6                                                        |   |   |   |
| 211945_s_at | -3.120483 | 6.53E-03   | Hs.695946 | ITGB1                                                      | T |   | T |

|             |           |             |           |          |   |   |   |
|-------------|-----------|-------------|-----------|----------|---|---|---|
| 210261_at   | -2.527264 | 0.001450    | Hs.497745 | KCNK2    |   | T | T |
| 202503_s_at | -8.649406 | 6.61E-03    | Hs.81892  | KIAA0101 | T | T |   |
| 204444_at   | -2.799535 | 0.006685    | Hs.8878   | KIF11    |   |   |   |
| 206364_at   | -2.578604 | 1.00E-02    | Hs.3104   | KIF14    |   |   |   |
| 219306_at   | -2.332971 | 0.0074554   | Hs.658939 | KIF15    |   |   |   |
| 222039_at   | -2.209388 | 6.80E-04    | Hs.135094 | KIF18B   |   |   |   |
| 209234_at   | 2.325738  | 1.29E-04    | Hs.97858  | KIF1B    |   |   |   |
| 218755_at   | -3.640581 | 0.012548    | Hs.73625  | KIF20A   |   |   |   |
| 204709_s_at | -2.835731 | 0.001945    | Hs.270845 | KIF23    |   |   |   |
| 209408_at   | -2.802597 | 5.82E-03    | Hs.69360  | KIF2C    |   |   |   |
| 218355_at   | -2.029146 | 0.008081    | Hs.648326 | KIF4A    |   |   |   |
| 212658_at   | -2.237456 | 0.0085969   | Hs.670094 | LHFPL2   |   | T |   |
| 215617_at   | -3.177227 | 0.0014048   | Hs.120323 | LOC26010 |   |   |   |
| 215446_s_at | -5.051629 | 3.63E-04    | Hs.102267 | LOX      |   |   |   |
| 218509_at   | -2.102305 | 0.0071931   | Hs.6846   | LPPR2    |   | T |   |
| 64899_at    | -2.26044  | 0.0149126   | Hs.6846   | LPPR2    |   | T |   |
| 203362_s_at | -2.653586 | 1.41E-02    | Hs.591697 | MAD2L1   |   |   |   |
| 220651_s_at | -2.222308 | 2.08E-04    | Hs.198363 | MCM10    |   |   |   |
| 204825_at   | -2.059052 | 1.34E-03    | Hs.184339 | MELK     |   |   |   |
| 212472_at   | -2.159203 | 0.003938    | Hs.501928 | MICAL2   |   |   |   |
| 212473_s_at | -2.164712 | 2.99E-03    | Hs.501928 | MICAL2   |   |   |   |
| 212022_s_at | -2.330813 | 7.15E-03    | Hs.80976  | MKI67    |   |   |   |
| 218883_s_at | -3.207901 | 0.004904768 | Hs.575032 | MLF1IP   |   |   |   |
| 203200_s_at | -2.561076 | 1.71E-04    | Hs.481551 | MTRR     | T |   |   |
| 218662_s_at | -3.00333  | 0.010619282 | Hs.567567 | NCAPG    |   |   |   |
| 218663_at   | -3.01228  | 0.023352265 | Hs.567567 | NCAPG    |   |   |   |
| 212949_at   | -2.225673 | 0.013316464 | Hs.308045 | NCAPH    |   |   |   |
| 204162_at   | -2.845414 | 2.19E-03    | Hs.414407 | NDC80    |   |   |   |
| 204641_at   | -4.426011 | 6.92E-03    | Hs.153704 | NEK2     |   |   |   |
| 211080_s_at | -2.266111 | 6.70E-03    | Hs.153704 | NEK2     |   |   |   |
| 218039_at   | -3.103316 | 3.31E-04    | Hs.615092 | NUSAP1   |   |   |   |
| 219978_s_at | -3.097255 | 9.91E-03    | Hs.615092 | NUSAP1   |   |   |   |
| 213599_at   | -2.60224  | 1.67E-02    | Hs.661645 | OIP5     |   |   |   |
| 219148_at   | -4.040434 | 2.46E-03    | Hs.104741 | PBK      |   |   |   |
| 212593_s_at | -2.03527  | 0.003140986 | Hs.232543 | PDCD4    | T | T | T |
| 220595_at   | 3.369064  | 0.002740485 | Hs.380044 | PDZRN4   |   |   |   |
| 202240_at   | -2.640049 | 4.66E-03    | Hs.592049 | PLK1     | T |   |   |
| 218009_s_at | -2.999283 | 4.99E-04    | Hs.567385 | PRC1     |   |   |   |
| 211373_s_at | -2.446932 | 2.25E-03    | Hs.25363  | PSEN2    | T | T | T |
| 208615_s_at | -2.365968 | 0.005901953 | Hs.470477 | PTP4A2   | T |   |   |
| 208617_s_at | -2.302916 | 3.04E-03    | Hs.470477 | PTP4A2   | T |   |   |

|             |           |             |           |           |   |   |   |
|-------------|-----------|-------------|-----------|-----------|---|---|---|
| 216988_s_at | -2.16383  | 7.24E-03    | Hs.470477 | PTP4A2    | T |   |   |
| 203554_x_at | -2.346504 | 0.003011021 | Hs.350966 | PTTG1     |   |   |   |
| 212262_at   | -2.003401 | 1.50E-02    | Hs.510324 | QKI       |   |   |   |
| 212636_at   | -7.191993 | 1.11E-03    | Hs.510324 | QKI       |   |   |   |
| 222077_s_at | -2.419047 | 2.89E-03    | Hs.708122 | RACGAP1   |   |   |   |
| 204146_at   | -2.444458 | 0.005715805 | Hs.709525 | RAD51AP1  |   |   |   |
| 201485_s_at | -2.942472 | 0.002752056 | Hs.79088  | RCN2      | T |   | T |
| 201486_at   | -2.743082 | 5.91E-03    | Hs.79088  | RCN2      | T |   | T |
| 201890_at   | -3.959339 | 0.005207405 | Hs.226390 | RRM2      |   |   |   |
| 209773_s_at | -3.914297 | 3.87E-04    | Hs.226390 | RRM2      |   |   |   |
| 219493_at   | -4.215069 | 0.003655329 | Hs.123253 | SHCBP1    |   |   |   |
| 201801_s_at | -2.192817 | 7.95E-04    | Hs.25450  | SLC29A1   |   |   |   |
| 221751_at   | -2.091293 | 0.021025514 | Hs.388400 | SLC2A3P1  |   |   |   |
| 203145_at   | -2.31356  | 3.28E-03    | Hs.514033 | SPAG5     |   |   |   |
| 209891_at   | -3.473555 | 0.010915261 | Hs.421956 | SPC25     | T |   |   |
| 209875_s_at | 2.945269  | 0.007512122 | Hs.313    | SPP1      |   |   |   |
| 205691_at   | 2.4837    | 0.021655962 | Hs.435277 | SYNGR3    |   |   |   |
| 218308_at   | -2.118303 | 1.63E-02    | Hs.104019 | TACC3     | T |   |   |
| 201147_s_at | -2.507032 | 5.62E-04    | Hs.701968 | TIMP3     |   |   |   |
| 201148_s_at | -2.049667 | 1.82E-02    | Hs.701968 | TIMP3     |   |   |   |
| 201149_s_at | -2.337733 | 0.004216083 | Hs.701968 | TIMP3     |   |   |   |
| 202338_at   | -2.3778   | 1.50E-03    | Hs.515122 | TK1       |   |   |   |
| 209753_s_at | -2.052007 | 0.038306687 | Hs.11355  | TMPO      |   | T |   |
| 209754_s_at | -2.456091 | 2.17E-02    | Hs.11355  | TMPO      |   | T |   |
| 204932_at   | -2.755277 | 4.26E-02    | Hs.81791  | TNFRSF11B |   |   |   |
| 204933_s_at | -2.27351  | 0.016607618 | Hs.81791  | TNFRSF11B |   |   |   |
| 201291_s_at | -3.561296 | 0.005110923 | Hs.156346 | TOP2A     |   |   |   |
| 201292_at   | -3.551408 | 0.001097579 | Hs.156346 | TOP2A     |   |   |   |
| 210052_s_at | -2.659428 | 3.50E-04    | Hs.244580 | TPX2      |   |   |   |
| 204033_at   | -2.318241 | 4.64E-04    | Hs.436187 | TRIP13    |   |   |   |
| 204822_at   | -3.64008  | 1.61E-02    | Hs.169840 | TTK       |   |   |   |
| 202954_at   | -2.617985 | 0.010857854 | Hs.93002  | UBE2C     |   |   |   |
| 218050_at   | -2.499335 | 0.006991552 | Hs.643655 | UFM1      |   |   |   |
| 219478_at   | -2.637833 | 7.52E-04    | Hs.36688  | WFDC1     |   |   |   |
| 204026_s_at | -2.09278  | 1.25E-02    | Hs.591363 | ZWINT     |   |   |   |
| 222288_at   | 2.104558  | 2.02E-03    | Hs.657591 |           |   |   |   |

5  
6  
7  
8  
9  
10

11 **Supplementary Table S2.** Primer pairs used to amplify 3'UTRs of miR-183 target  
 12 genes

| Gene Name                | Gene Bank   | Primer Pairs                                                                                                  |
|--------------------------|-------------|---------------------------------------------------------------------------------------------------------------|
| <u>KIAA0101</u><br>3'UTR | NM_014736.4 | For: 5'- CGA CTC GAG ATT CCT GAA GAG GCA GGA AGC AGT<br>Rev: 5'-TAT GCGGCC GCT CAC CTT GTT AGG CAG GAT GGT CT |
| <i>PLK</i><br>3'UTR      | NM_003916.3 | For: 5'- TATCTCGAGAGTCTCTGGAGGAGTACGGCTG<br>Rev: 5'- TATGCGGCCGCTGCATAAAGCCAAGGAAAGGACAG                      |
| <i>PSEN2</i><br>3'UTR    | NM_004050.3 | For: 5'- AGACTCGAGTCCATCACGTTCCGGGCTCATCTTT<br>Rev: 5'- TATGCGGCCGCTGGACAAAGCATTGGGAACACTCC                   |
| <i>CCNB1</i><br>3'UTR    | NM_139343.1 | For: 5'- GAGCTCGAGAACAAGTATGCCACATCGAAGCA<br>Rev: 5'- ACTGCGGCCGC ACTTAGAATTATGGCAGCAATCACAAAG                |
| <i>SPC25</i><br>3'UTR    | NM_001166.3 | For: 5'- GCGCTCGAGTCAAGAGAATGTAAGGAAGACCAACA<br>Rev: 5'- TATGCGGCCGCTGCACACGTATGTTTATTTCGGCAC                 |

13  
 14  
 15  
 16  
 17  
 18  
 19  
 20  
 21  
 22  
 23  
 24  
 25  
 26

**Supplementary Fig S1.** Confirmation of additional miR-183 targets. The 3'UTRs of PLK, PSEN2, CCNB1 and SPC25 containing miR-183 target site was cloned into the psiCheck2 dual-luciferase reporter vector using primers listed in supplementary table 2 and co-transfected with either miR-183 mimic (183M) or scramble control mimic (ConM) into HEK 293 cells. The luciferase activities of Renilla (with insert) and Firefly (endogenous) were analyzed 24 hours post-transfection. The ratio of Renilla/Firefly activities of ConM or 183M was recorded. The data represent percentage of ConM  $\pm$  SD. n=3; \*, p< 0.05 compared to ConM by Mann-Whitney U Test.

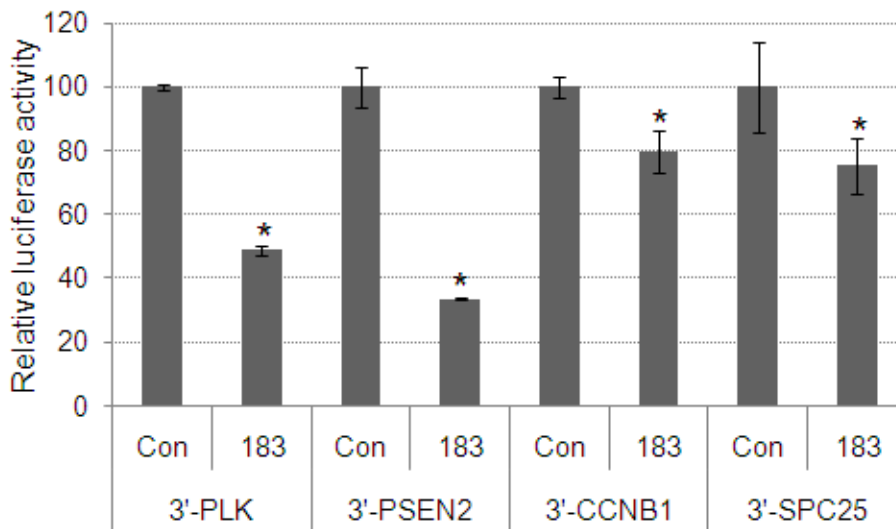

27  
 28
